# Supplementary material for: RNA G-quadruplex structures control ribosomal protein production
Source: PubMed Central journal article supplement (PMC8611094; doi:10.1038/s41598-021-01847-6), 2021-11-23

Supplementary Information: Blots and Gels

**RNA G-quadruplex structures control ribosomal protein production**

Dhaval Varshney<sup>1</sup>, Sergio Martinez Cuesta<sup>1,4</sup>, Barbara Herdy<sup>1</sup>, Umami Binti Abdullah<sup>1,5</sup>, David Tannahill<sup>1</sup>, Shankar Balasubramanian<sup>1,2,3\*</sup>

<sup>1</sup>Cancer Research UK Cambridge Institute, Li Ka Shing Centre, Robinson Way, Cambridge, CB2 0RE, UK.

<sup>2</sup>Yusuf Hamied Department of Chemistry, University of Cambridge, Cambridge, CB2 1EW, UK

<sup>3</sup>School of Clinical Medicine, University of Cambridge, Cambridge, CB2 0SP, UK

<sup>4</sup>Present Address: Data Sciences and Quantitative Biology, Discovery Sciences, AstraZeneca, Cambridge, UK

<sup>5</sup>Present Address: Weatherall Institute of Molecular Medicine, University of Oxford, Oxford, UK.

\*Correspondence: sb10031@cam.ac.uk (S.B.)

Figure 3b

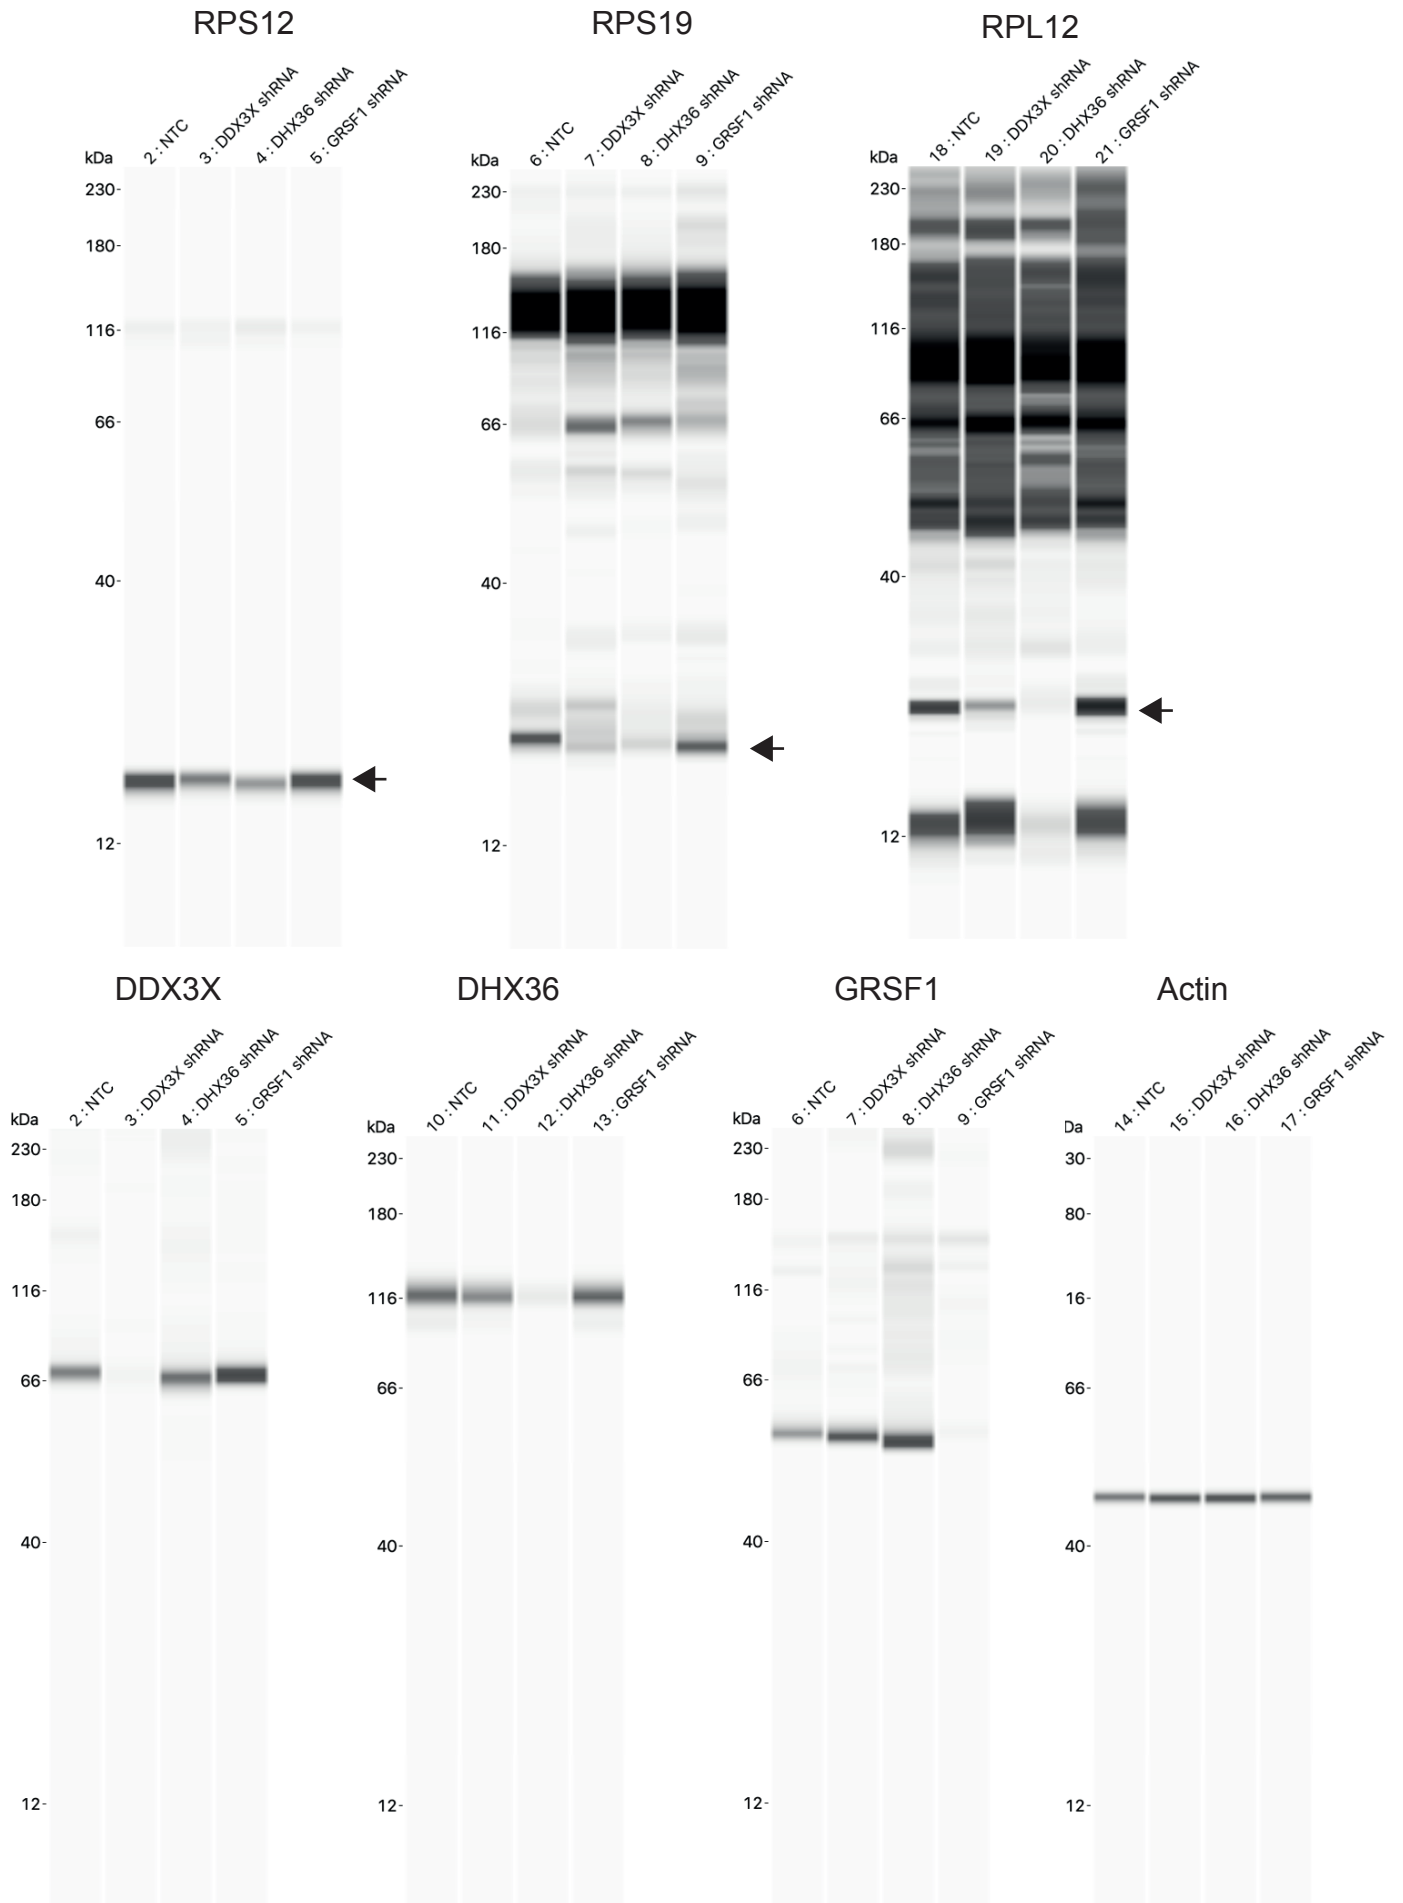

# Supplementary Figure 1a

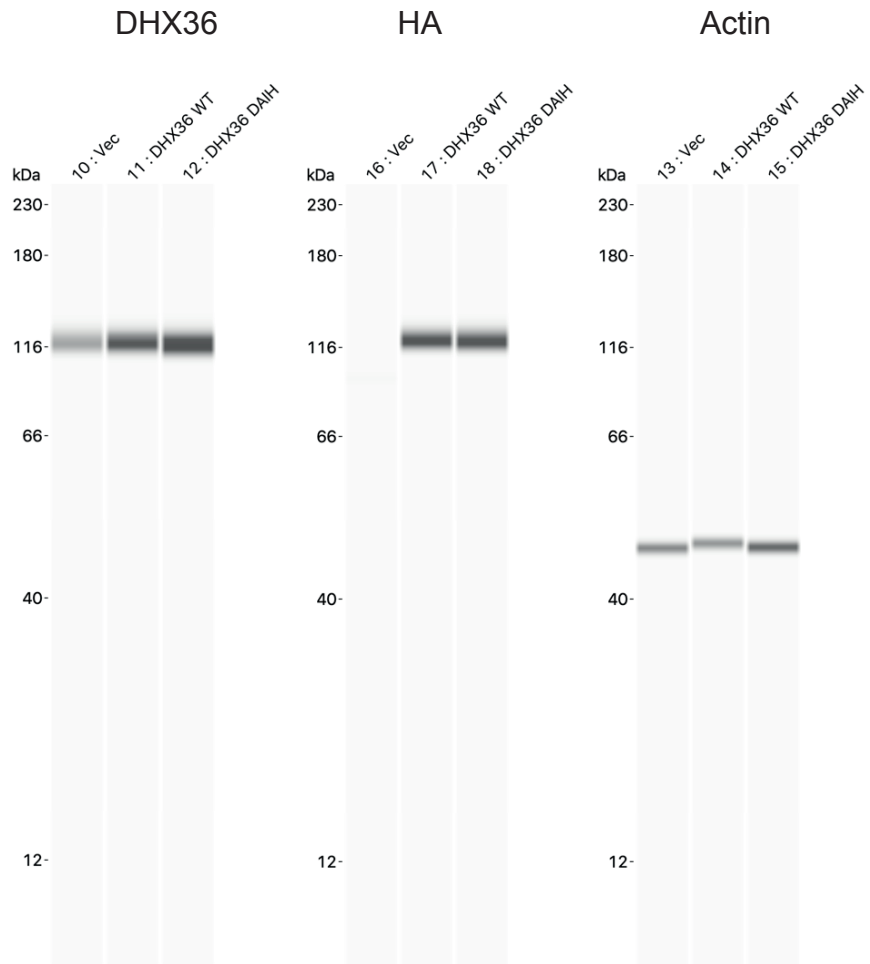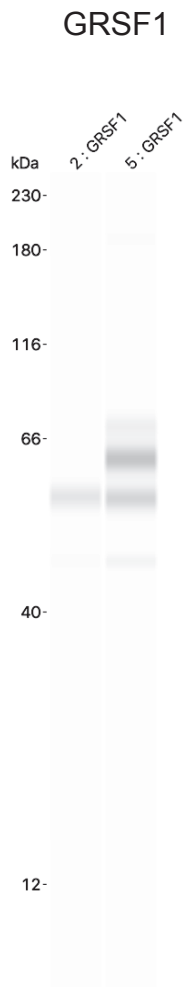

Supplementary Figure 2d

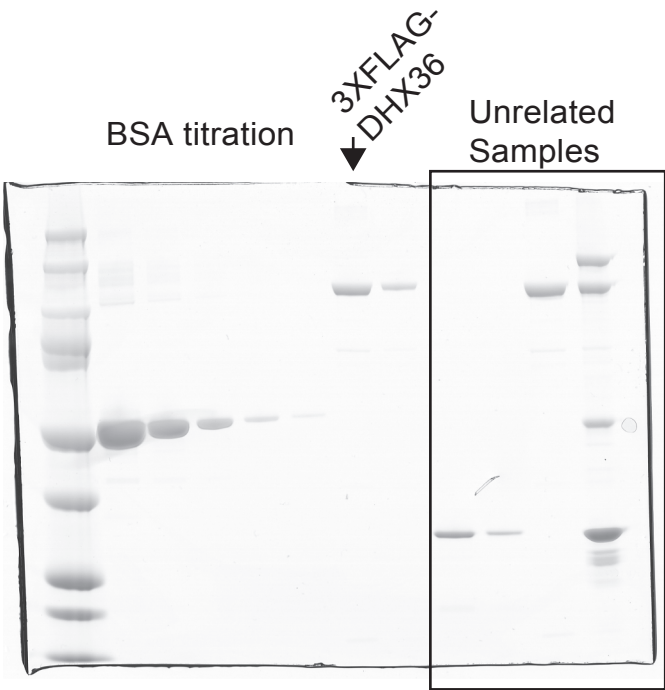

Supplementary Figure 12a

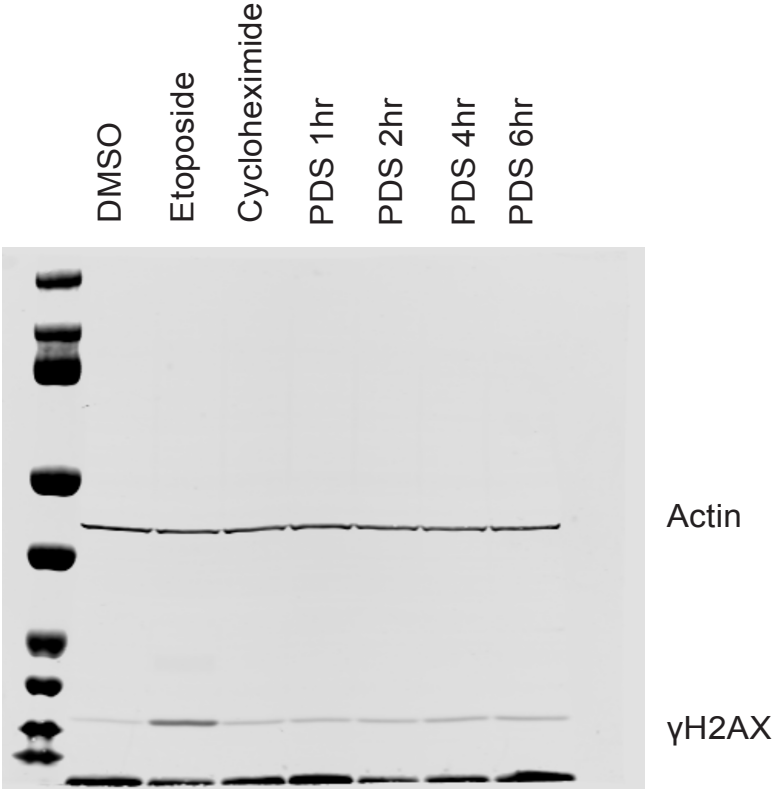

Supplement: 41598_2021_1847_MOESM2_ESM.pdf [file 41598_2021_1847_MOESM2_ESM.pdf]
